# Supplementary material
Source: PubMed Central journal article supplement (PMC4264863)

# S Fig .1

GA  $\mu$ M

0

20

40

60

LC3-I

LC3-II

GAPDH

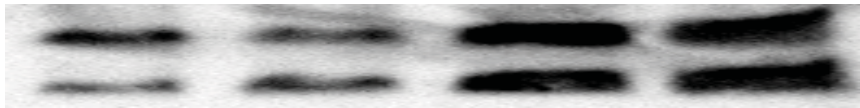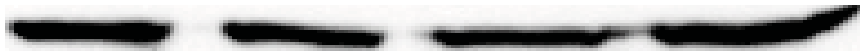

Supplement: jf503968k_si_002.pdf [file jf503968k_si_002.pdf]

S Fig .2

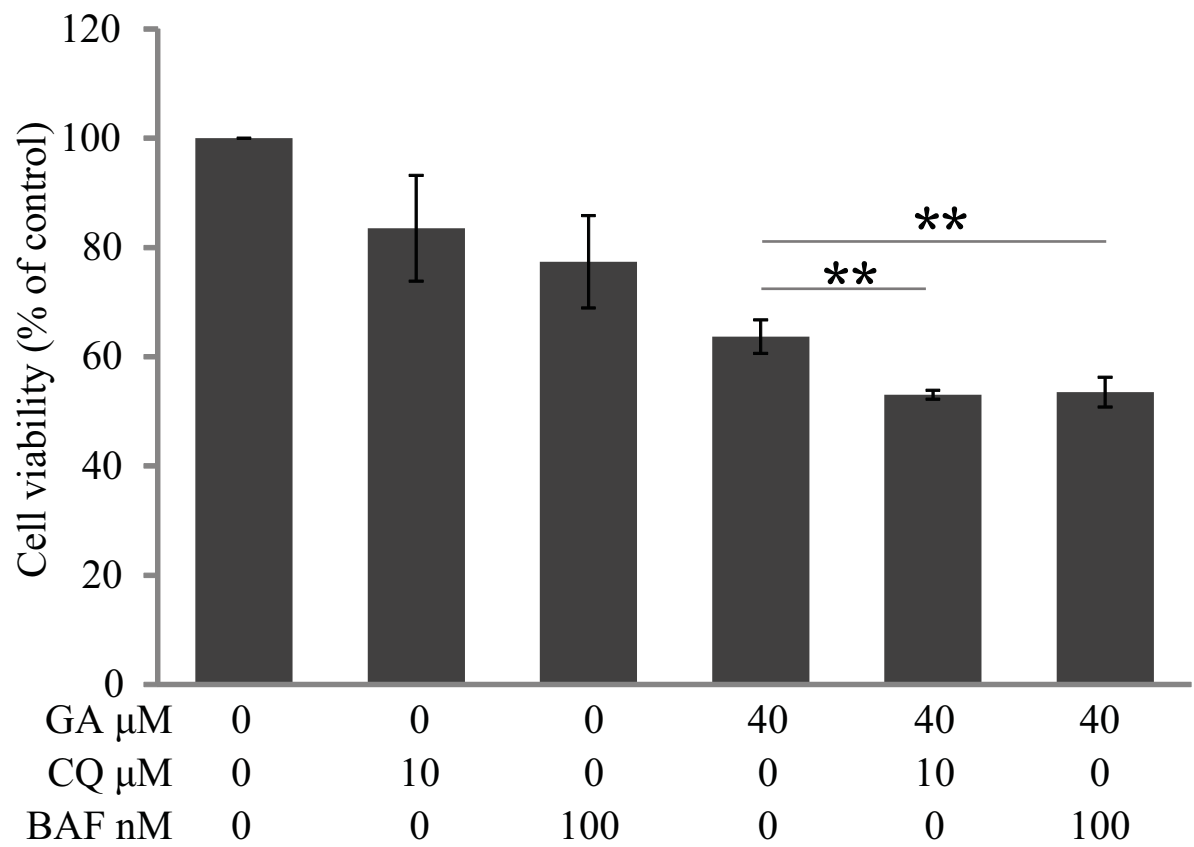

Supplement: jf503968k_si_003.pdf [file jf503968k_si_003.pdf]
